# Supplementary material for: Examining the Evidence Regarding Smoking and Patient Outcomes for Isolated Meniscus Pathology: A Comprehensive Systematic Review and Meta-Analysis
Source: MDPI journal article supplement (doi:10.3390/life14050584), 2024-04-30
Supplement: s1 [file s1]

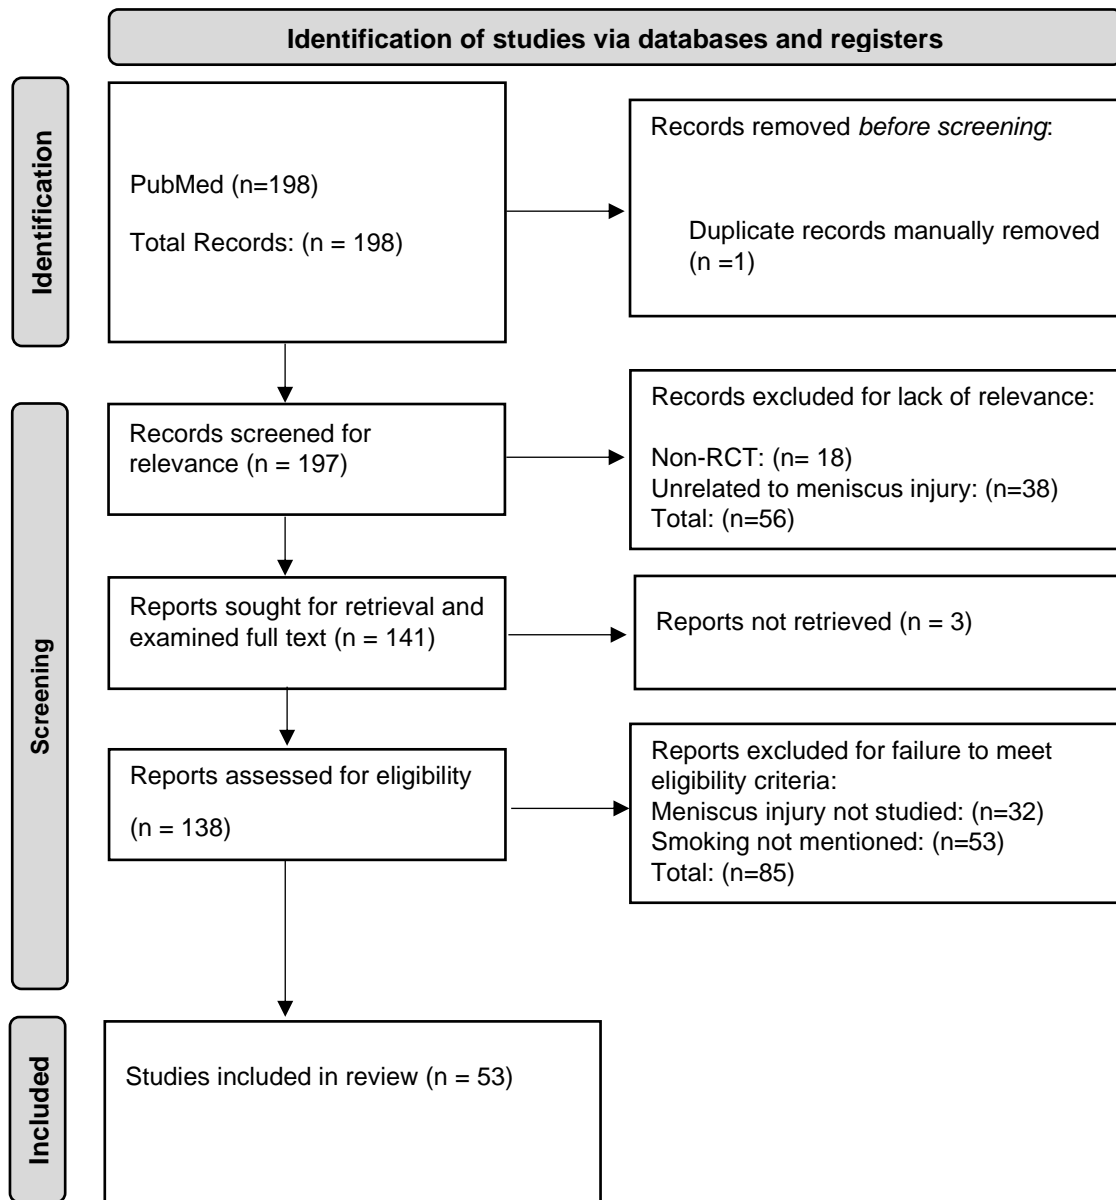

**Supplemental Figure S1:** Preferred Reporting Items for Systematic Reviews and Meta-Analyses (PRISMA) diagram for the secondary search of this study.
